# Supplementary material for: FXR inhibition may protect from SARS-CoV-2 infection by reducing ACE2
Source: PubMed Central journal article supplement (PMC9977684; doi:10.1038/s41586-022-05594-0), 2022-12-05
Supplement: 41586_2022_5594_MOESM1_ESM.pdf [file 41586_2022_5594_MOESM1_ESM.pdf]

## Supplementary information

---

# FXR inhibition may protect from SARS-CoV-2 infection by reducing ACE2

---

In the format provided by the authors and unedited

## Supplementary Information

### FXR inhibition may protect from SARS-CoV-2 infection by reducing ACE2

Teresa Brevini\*, Mailis Maes, Gwilym J. Webb, Binu V. John Claudia D. Fuchs, Gustav Buescher, Lu Wang, Chelsea Griffiths, Marnie Brown, William Scott, Pehuén Pereyra Gerber, William T. H. Gelson, Stephanie Brown, Scott Dillon, Daniele Muraro, Jo Sharp, Megan Neary, Helen Box, Lee Tatham, James Stewart, Paul Curley, Henry Pertinez, Sally Forrest, Petra Mlcochova, Sagar S. Varankar, Mahnaz Darvish-Damavandi, Victoria L. Mulcahy, Rhoda E. Kuc, Thomas L. Williams, James Heslop, Davide Rossetti, Vasileios Galanakis, Marta Vila-Gonzalez, Olivia C. Tysoe, Thomas W. M. Crozier, Johannes Bargehr, Sanjay Sinha, Sara S. Upponi, Corinna Fear, Lisa Swift, Kouros Saeb-Parsy, Susan E. Davies, Axel Wester, Hannes Hagström, Espen Melum, Darran Clements, Peter Humphreys, Jo Herriott, Edyta Kijak, Helen Cox, Chloe Bramwell, Anthony Valentijn, Christopher J. R. Illingworth, Bassam Dahman, Dustin R. Bastaich, Raphaella D. Ferreira, Thomas Marjot, Eleanor Barnes, Andrew M. Moon, A. Sidney Barritt IV, Ravindra K. Gupta, Stephen Baker, Anthony P. Davenport, Gareth Corbett, Vassillis G. Gorgoulis, Simon J. A. Buczacki, Joo-Hyeon Lee, Nicholas J. Matheson, Michael Trauner, Andrew J. Fisher, Paul Gibbs, Andrew J. Butler, Christopher J. E. Watson, George F. Mells, Gordon Dougan, Andrew Owen, Ansgar W. Lohse, Ludovic Vallier\*<sup>†</sup> and Fotios Sampaziotis\*<sup>†</sup>

<sup>†</sup> These authors share senior authorship.

\*Correspondence to: Fotios Sampaziotis, [fs347@cam.ac.uk](mailto:fs347@cam.ac.uk); Ludovic Vallier, [lv255@cam.ac.uk](mailto:lv255@cam.ac.uk); Teresa Brevini, [tb647@cam.ac.uk](mailto:tb647@cam.ac.uk).

## Supplementary Figure S1. Gating strategy for flow cytometry analyses.

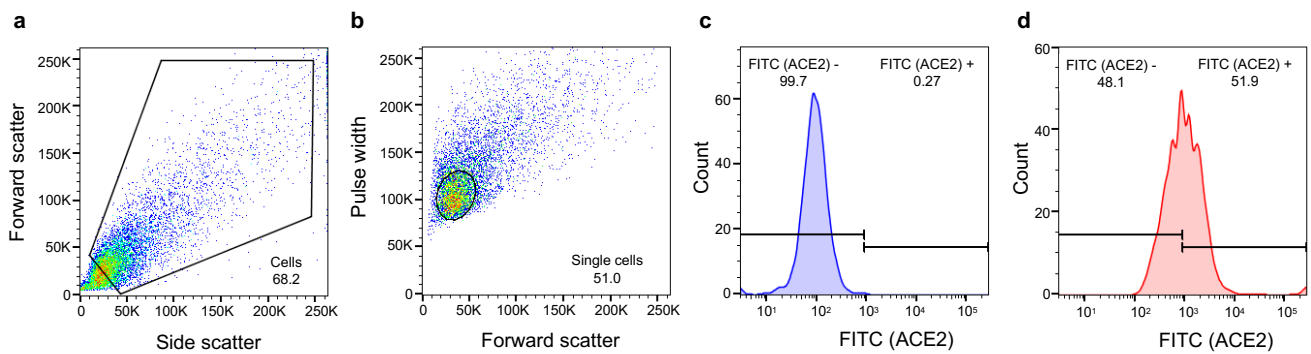

### Supplementary Figure S1. Gating strategy for flow cytometry analyses. (a-d)

Representative flow cytometry plots showing gating strategy for all flow cytometric analyses, gating on: (a) exclusion of debris; (b) exclusion of doublets; (c) secondary-only control to exclude negative population; (d) representative ACE2+ population.

**Supplementary Table S1.** List of primary and secondary antibodies.

| <b>Target protein</b>              | <b>Company</b>   | <b>Product code</b> | <b>Dilution</b> |
|------------------------------------|------------------|---------------------|-----------------|
| ACE2                               | R&D              | AF933               | 1:50 / 1:100    |
| ACE2                               | abcam            | ab15348             | 1:500           |
| ACE2                               | abcam            | ab108209            | 1:500 / 1:100   |
| EPCAM                              | R&D              | MAB9601             | 1:50 / 1:100    |
| EPCAM                              | R&D              | AF960               | 1:100           |
| Cytokeratin 19                     | abcam            | ab7754              | 1:100           |
| Cytokeratin 19                     | abcam            | ab52625             | 1:100           |
| SOX2                               | abcam            | ab15830             | 1:100           |
| SOX2                               | R&D              | AF2018              | 1:100           |
| NKX2.1                             | abcam            | ab72876             | 1:100           |
| Cytokeratin 5                      | Thermo Fisher    | MA5-17057           | 1:100           |
| Surfactant protein C               | Merck Millipore  | AB3786              | 1:300           |
| Acetylated alpha tubulin           | Sigma            | T7451               | 1:500           |
| CD31                               | Novus biological | NB100-2284          | 1:100           |
| CD31                               | abcam            | ab119339            | 1:100           |
| Alpha smooth muscle actin          | abcam            | ab124964            | 1:100           |
| SARS-CoV spike glycoprotein        | abcam            | ab273433            | 1:100           |
| SARS-CoV-2 nucleocapsid            | Sino Biological  | 40143-R019          | 1:100           |
| SOX17                              | R&D              | AF1924              | 1:100           |
| FXR                                | Novus biological | NBP2-16550          | 1:100           |
| FXR                                | Santa Cruz       | sc-25309 X          | 1:100           |
| Actin                              | abcam            | ab208080            | 1:100           |
| Alexa Fluor Donkey Anti-Rabbit 568 | Invitrogen       | A10042              | 1:1000          |
| Alexa Fluor Donkey Anti-Rabbit 488 | Invitrogen       | A21206              | 1:1000          |
| Alexa Fluor Donkey Anti-Rabbit 568 | Invitrogen       | A10042              | 1:1000          |
| Alexa Fluor Donkey Anti-Goat 488   | Invitrogen       | A11055              | 1:1000          |
| Alexa Fluor Donkey Anti-Goat 568   | Invitrogen       | A11057              | 1:1000          |
| Alexa Fluor Donkey Anti-Mouse 488  | Invitrogen       | A21202              | 1:1000          |
| Alexa Fluor Donkey Anti-Mouse 647  | Invitrogen       | A31571              | 1:1000          |

**Supplementary Table S2.** List of primers used for QPCR.

| Target gene                    |         | Primer sequence (5' – 3')  |
|--------------------------------|---------|----------------------------|
| <i>HMBS</i>                    | Forward | GGAGCCATGTCTGGTAACGG       |
|                                | Reverse | CCACGCGAATCACTCTCATCT      |
| <i>GAPDH</i>                   | Forward | AGGACTCATGACCACAGTCCATGC   |
|                                | Reverse | GATGACCTTGCCCACAGCCTT      |
| <i>KRT19</i>                   | Forward | ACGACCATCCAGGACCTGCGG      |
|                                | Reverse | TCCCACTTGGCCCCTCAGCGTA     |
| <i>ACE2</i>                    | Forward | CTCCTAACCAGCCCCCTGTT       |
|                                | Reverse | TGGAGGCATAAGGATTTTCTCCAC   |
| SARS-CoV-2 <i>RdRp</i>         | Forward | ATGGGTTGGGATTATCCTAAATGTGA |
|                                | Reverse | GCAGTTGTGGCATCTCCTGATGAG   |
| <i>MS2</i>                     | Forward | TGGCACTACCCCTCTCCGTATTC    |
|                                | Reverse | GTACGGGCGACCCACGATGAC      |
| <i>NRB02</i>                   | Forward | CCTGCCTGAAAGGGACCATCC      |
|                                | Reverse | GCACCAGGGTTCCAGGACTTC      |
| <i>NR1H4</i>                   | Forward | GCTTTGCTGAAAGGGTCTGC       |
|                                | Reverse | CAGAATGCCAGACGGAAGT        |
| <i>IL-1<math>\beta</math></i>  | Forward | AAACAGATGAAGTGCTCCTTCCAGG  |
|                                | Reverse | TGGAGAACACCACTTGTTGCTCCA   |
| <i>IL-6</i>                    | Forward | AATTCGGTACATCCTCGACGG      |
|                                | Reverse | GGTTGTTTTCTGCCAGTGCC       |
| <i>IFN<math>\alpha</math></i>  | Forward | GACTCCATCTTGGCTGTGA        |
|                                | Reverse | TGATTTCTGCTCTGACAACCT      |
| <i>IFN<math>\lambda</math></i> | Forward | TCGCTTCTGCTGAAGGACTGCA     |
|                                | Reverse | CCTCCAGAACCTTCAGCGTCAG     |
| <i>KRT7</i>                    | Forward | GATTGCTGGCCTTCGGGGT        |
|                                | Reverse | TCATCACAGAGATATTCACGGCTC   |
| <i>CFTR</i>                    | Forward | AGTTGCAGATGAGGTTGGGC       |
|                                | Reverse | AAAGAGCTTCACCCTGTCCG       |
| <i>GGT1</i>                    | Forward | GTGAGAGCAGTTGGCTGTGC       |
|                                | Reverse | GTTGAACTCTGCTGTGGGGC       |
| <i>SOX17</i>                   | Forward | CGCACGGAATTTGAACAGTA       |
|                                | Reverse | GGATCAGGGACCTGTCACAC       |
| <i>mGAPDH</i>                  | Forward | GCACAGTCAAGGCCGAGAAT       |
|                                | Reverse | GCCTTCTCCATGGTGGTGAA       |
| <i>mACE2</i>                   | Forward | TCCATTGGTCTTCTGCCATCC      |
|                                | Reverse | AACGATCTCCCCTTCATCTC       |
| <i>mSHP</i>                    | Forward | AAGGGCTTGCTGGACAGTTA       |
|                                | Reverse | TCTCTTCTCCGCCCTATCA        |
| <i>hGAPDH</i>                  | Forward | AGGTTGTCTCCTGCGACTTCA      |
|                                | Reverse | GCATCAAAGGTGGAAGAGTGG      |
| <i>hACE2</i>                   | Forward | AAAGTGGTGGGAGATGAAGCGA     |
|                                | Reverse | GAACAGAGCTGCAGGGTCAC       |

*KRT19*, CK19; *NRB02*, SHP; *NR1H4*, FXR; *KRT7*, CK7.

**Supplementary Table S3.** List of primers used for ChIP-QPCR.

| <b>Target gene</b>          | <b>Primer sequence (5' – 3')</b> |                          |
|-----------------------------|----------------------------------|--------------------------|
| <i>OSTa</i>                 | Forward                          | AGTTCAGGGCTTTGGGTAATTAAC |
|                             | Reverse                          | GGTGGAGGTCAGGGAAGGAAGA   |
| <i>ACE2</i>                 | Forward                          | CGCTATCTTGAGGAAGAAGGGGAA |
|                             | Reverse                          | AGCAGGTACAAAGCATATGCAACC |
| <i>ACE2</i> negative region | Forward                          | AAGCGAGCTCAGTGCCTCA      |
|                             | Reverse                          | AGGTAGGCCCTTGAACCCTG     |

**Supplementary Table S4.** List of primers used for luciferase reporter.

| <b>Target</b>              | <b>Primer sequence (5' – 3')</b>                                |
|----------------------------|-----------------------------------------------------------------|
| <i>gACE2</i>               | Forward AGTTCAGGGCTTTGGGTAATTAAC                                |
|                            | Reverse GGTGGAGGTCAGGGAAGGAAGA                                  |
| <i>gSHP</i>                | Forward ATTGAGATGCAGATCGCAGATCTCGAGCCCCTCATGGTTAGGGATCTGCTCTCAC |
|                            | Reverse TAGGTACCGAGCTCTTACGCGTGCTAGCCCCCTGCTTCTGGCTGACAACAG     |
| <i>IR1<br/>mutagenesis</i> | Forward AAGCGAGCTCAGTGTCCTCA                                    |
|                            | Reverse AGGTAGGCCCTTGAACCCTG                                    |

**Supplementary Table S5.** Volunteer cohort characteristics relative to Fig. 4b.

| <b>Age</b> | <b>Sex</b>    | <b>Weight (kg)</b> | <b>Daily UDCA dose (mg)</b> |
|------------|---------------|--------------------|-----------------------------|
| 61         | Male          | 80                 | 1250                        |
| 42         | Male          | 82                 | 1250                        |
| 47         | Female        | 50                 | 750                         |
| <i>34</i>  | <i>Female</i> | <i>68</i>          | <i>1000</i>                 |
| <i>46</i>  | <i>Male</i>   | <i>74</i>          | <i>1250</i>                 |
| 30         | Male          | 63                 | 1000                        |
| 28         | Female        | 61                 | 1000                        |
| 45         | Female        | 75                 | 1000                        |

Participants shown in italics were excluded due to undetectable RNA levels. See methods.



**Supplementary Table S6.** UK-PBC cohort characteristics relative to Extended Data Figure 10.

Please, refer to downloadable xls file and Supplementary File S1 for the code employed in the analysis.

**Supplementary Table S7.** COVID-Hep and SECURE-Liver registries patient cohort characteristics.

|                                      | Total       | No UDCA     | UDCA       | Propensity score matched<br>(5:1) (No UDCA:UDCA) |
|--------------------------------------|-------------|-------------|------------|--------------------------------------------------|
| <b>n, total</b>                      | 788         | 757         | 31         | 155                                              |
| <b>Sex (Female)</b>                  | 347 (44.0%) | 319 (42.1%) | 28 (90.3%) | 139 (89.6%)                                      |
| <b>Age (years; median, IQR)</b>      | 58 (47–67)  | 58 (47–67)  | 56 (44–63) | 57 (47–63)                                       |
| <b>BMI (overweight)</b>              | 445 (56.4%) | 434 (57.3%) | 11 (35.4%) | 44 (28.3%)                                       |
| <b>Diabetes</b>                      | 295 (37.4%) | 291 (38.4%) | 4 (12.9%)  | 24 (15.4%)                                       |
| <b>NAFLD</b>                         | 378 (47.9%) | 376 (49.6%) | 2 (6.4%)   | 10 (6.4%)                                        |
| <b>Immunosuppression</b>             | 78 (9.9%)   | 70 (9.25%)  | 8 (25.8%)  | 41 (26.4%)                                       |
| <b>Chronic respiratory disease</b>   | 104 (13.2%) | 101 (13.3%) | 3 (9.6%)   | 20 (12.9%)                                       |
| <b><i>Liver disease severity</i></b> |             |             |            |                                                  |
| <b>CLD, no cirrhosis</b>             | 447 (56.7%) | 423 (55.8%) | 24 (77.4%) | 122 (78.7%)                                      |
| <b>CTP A cirrhosis</b>               | 184 (23.3%) | 182 (24.0%) | 2 (6.4%)   | 9 (5.8%)                                         |
| <b>CTP B cirrhosis</b>               | 101 (12.8%) | 97 (12.8%)  | 4 (12.9%)  | 19 (12.2%)                                       |
| <b>CTP C cirrhosis</b>               | 56 (7.1%)   | 55 (7.2%)   | 1 (3.2%)   | 5 (3.2%)                                         |
| <b><i>COVID-19 outcome</i></b>       |             |             |            |                                                  |
| <b>Hospitalised</b>                  | 636 (80.7%) | 625 (82.5%) | 11 (35.4%) | 91 (58.7%)                                       |
| <b>ICU requirement</b>               | 214 (27.1%) | 213 (28.1%) | 1 (3.2%)   | 21(13.5%)                                        |
| <b>ICU admission</b>                 | 172 (21.8%) | 171 (22.5%) | 1 (3.2%)   | 20 (12.9%)                                       |
| <b>Invasive ventilation</b>          | 122 (15.4%) | 121 (15.9%) | 1 (3.2%)   | 15 (9.6%)                                        |
| <b>Death</b>                         | 117 (14.8%) | 117 (15.4%) | 0 (0%)     | 14 (9.0%)                                        |

UDCA, ursodeoxycholic acid; IQR, interquartile range; BMI, body mass index; CLD, chronic liver disease; CTP, *Child-Turcotte-Pugh* class;

BMI, body mass index; NAFLD, non-alcoholic fatty liver disease; ICU, intensive care unit.

**Supplementary Table S8.** Liver disease aetiology relative to Fig. 4d.

| Liver disease aetiology                                                 | No UDCA           | UDCA              |
|-------------------------------------------------------------------------|-------------------|-------------------|
| <b>Cholestatic only</b>                                                 | <b>20 (12.9%)</b> | <b>20 (64.5%)</b> |
| Primary biliary cholangitis (PBC)                                       | 1 (0.6%)          | 20 (64.5%)        |
| Primary sclerosing cholangitis (PSC)                                    | 17 (11.0%)        | 0 (0.0%)          |
| Other cholestatic (ICP, Biliary atresia)                                | 2 (1.3%)          | 0 (0.0%)          |
| <b>Autoimmune</b>                                                       | <b>47 (30.3%)</b> | <b>9 (29.0%)</b>  |
| Autoimmune hepatitis (AIH)                                              | 46 (29.7%)        | 1 (3.2%)          |
| Overlap syndrome (PBC/AIH)                                              | 1 (0.6%)          | 8 (25.8%)         |
| <b>Non-alcoholic fatty liver disease (NAFLD)</b>                        | <b>10 (6.5%)</b>  | <b>2 (6.5%)</b>   |
| NAFLD                                                                   | 8 (5.2%)          | 0 (0.0%)          |
| NAFLD and PBC                                                           | 0 (0.0%)          | 2 (6.5%)          |
| NAFLD and viral hepatitis                                               | 2 (1.3%)          | 0 (0.0%)          |
| <b>Viral hepatitis</b>                                                  | <b>63 (40.6%)</b> | <b>0 (0.0%)</b>   |
| <b>Other (congenital; cryptogenic; veno-occlusive disease; unknown)</b> | <b>15 (9.7%)</b>  | <b>0 (0.0%)</b>   |
| <b>n, total</b>                                                         | <b>155</b>        | <b>31</b>         |

**Supplementary Table S9.** VOCAL registry patient cohort characteristics.

|                                             | <b>Total</b> | <b>No UDCA</b> | <b>UDCA</b> | <b>Propensity score matched<br/>(3:1) (No UDCA:UDCA)</b> |
|---------------------------------------------|--------------|----------------|-------------|----------------------------------------------------------|
| <b>n, total</b>                             | 119          | 95             | 24          | 72                                                       |
| <b>Sex (Female)</b>                         | 3 (2.5%)     | 1 (1.1%)       | 2 (8.3%)    | 1 (1.4%)                                                 |
| <b>Age (years; median, IQR)</b>             | 58.9         | 59.0 (9.2)     | 58.5 (9.0)  | 57.6 (8.9)                                               |
| <b>BMI (BMI; median IQR)</b>                | 29.75        | 30.0 (4.3)     | 28.8 (7.9)  | 29.6 (4.1)                                               |
| <b>Diabetes</b>                             | 100 (84.0%)  | 78 (82.1%)     | 22 (91.7%)  | 61 (84.7%)                                               |
| <b>Hypertension</b>                         | 97 (81.5%)   | 77 (81.1%)     | 20 (83.3%)  | 60 (83.3%)                                               |
| <b>Kidney transplantation</b>               | 21 (17.6%)   | 17 (17.9%)     | 4 (16.7%)   | 16 (22.2%)                                               |
| <b>Smoker</b>                               | 67 (56.3%)   | 56 (59.0%)     | 11 (45.8%)  | 45 (62.5%)                                               |
| <i><b>Immunosuppression</b></i>             |              |                |             |                                                          |
| <b>Calcineurin inhibitors</b>               | 109 (91.6%)  | 87 (91.6%)     | 22 (91.7%)  | 68 (94.4%)                                               |
| <b>Anti-metabolites</b>                     | 73 (61.3%)   | 61 (64.2%)     | 12 (50.0%)  | 46 (63.9%)                                               |
| <b>Chronic respiratory disease</b>          | 44 (37.0%)   | 37 (39.0%)     | 7 (29.2%)   | 27 (37.5%)                                               |
| <i><b>Ethnicity</b></i>                     |              |                |             |                                                          |
| <b>White</b>                                | 74 (62.2%)   | 59 (62.1%)     | 15 (62.5%)  | 44 (61.1%)                                               |
| <b>Black</b>                                | 20 (16.8%)   | 14 (14.7%)     | 6 (25.0%)   | 12 (16.7%)                                               |
| <b>Hispanic/Latino</b>                      | 8 (6.7%)     | 8 (8.4%)       | 0 (0%)      | 5 (6.9%)                                                 |
| <b>Other</b>                                | 16 (13.4%)   | 14 (14.7%)     | 2 (8.3%)    | 11 (15.3%)                                               |
| <b>Unknown</b>                              | 1 (0.8%)     | 0 (0%)         | 1 (4.2%)    | 0 (0%)                                                   |
| <i><b>Location in the United States</b></i> |              |                |             |                                                          |
| <b>Northeast</b>                            | 28 (23.5%)   | 25 (26.3%)     | 3 (12.5%)   | 28 (25.0%)                                               |
| <b>Southeast</b>                            | 20 (16.8%)   | 17 (17.9%)     | 3 (12.5%)   | 12 (16.7%)                                               |
| <b>Midwest</b>                              | 34 (28.6%)   | 21 (22.1%)     | 13 (54.2%)  | 20 (27.8%)                                               |
| <b>South</b>                                | 18 (15.1%)   | 15 (15.8%)     | 3 (12.5%)   | 13 (18.1%)                                               |
| <b>Northwest</b>                            | 6 (5.0%)     | 6 (6.3%)       | 0 (0%)      | 0 (0%)                                                   |
| <b>Southwest</b>                            | 13 (10.9%)   | 11 (11.6%)     | 2 (8.3%)    | 9 (12.5%)                                                |

UDCA, ursodeoxycholic acid; IQR, interquartile range; BMI, body mass index.
